# Supplementary material
Source: Springer Nature journal article supplement (https://www.springermedizin.de/resource/supplementary/12970_2012_354_MOESM4_ESM.pdf/9594846)

**TEAC Changes at Visit 2 (No Product)**

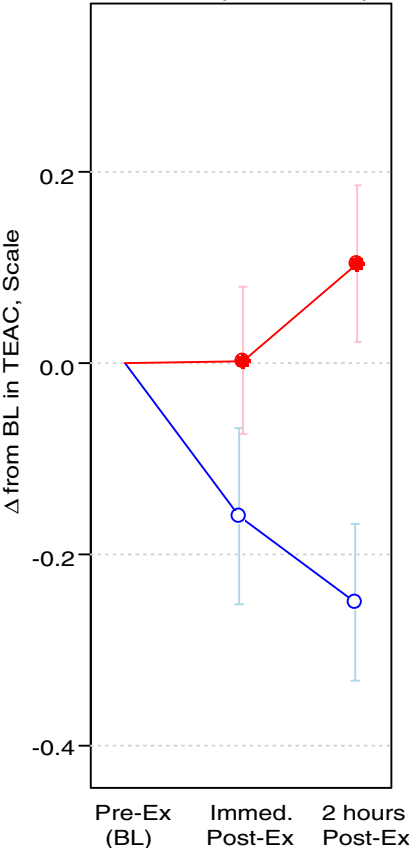

**TEAC Changes at Visit 3 (With Product)**

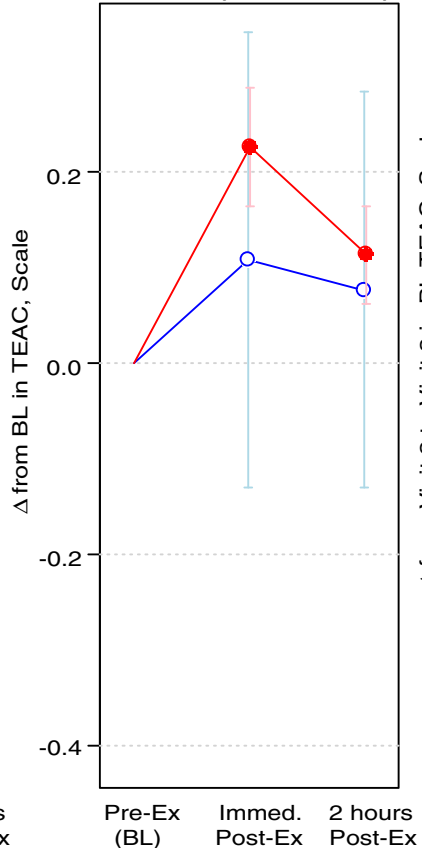

**TEAC Pre-Ex. Visit 2 to Visit 3 Changes**

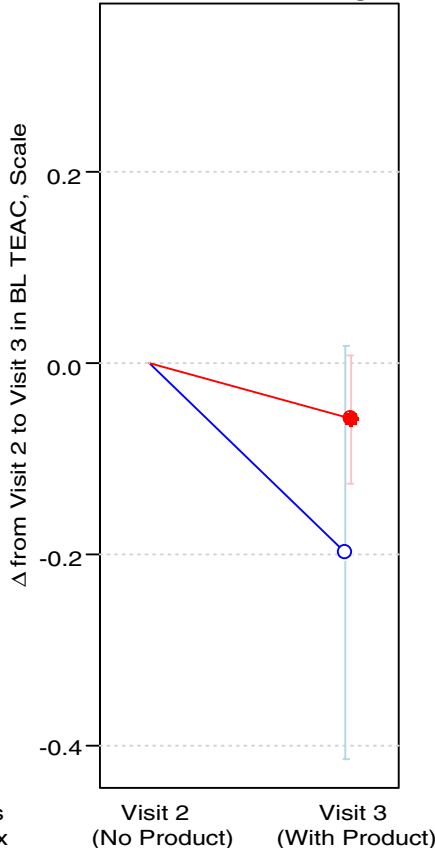

Supplement: MOESM4 [file 9594846]
